# Supplementary material for: Highly ion conductive ion solvating membranes for durable alkaline water electrolysis at low temperature and voltage
Source: Royal Society of Chemistry journal article supplement (doi:10.1039/d4ta02511c), 2024-01-01
Supplement: d4ta02511c1.pdf [file d4ta02511c1.pdf]

## Supporting Information

### highly ion conductive ion solvating membranes for durable alkaline water electrolysis at low temperature and voltage

*Bin Hu,<sup>a,b</sup> Zhongyan Li,<sup>d</sup> Lei Liu,<sup>\*c</sup> Min Liu,<sup>a,b</sup> Yingda Huang,<sup>a</sup> Tiegeng Guo,<sup>e</sup> Rong Zhang,<sup>a,b</sup> Kang Geng,<sup>\*a</sup> and Nanwen Li,<sup>\*a,b</sup>*

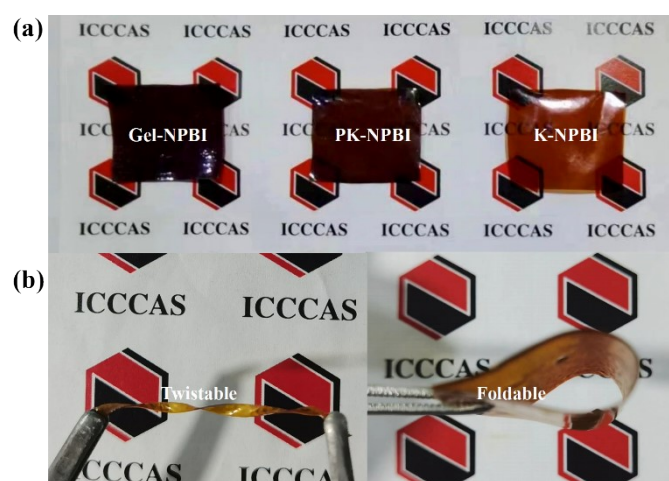

**Figure S1.** Digital photos of (a) three kinds of KOH doped NPBI membranes and (b) Gel-NPBI membrane be applied in twisting and folding.

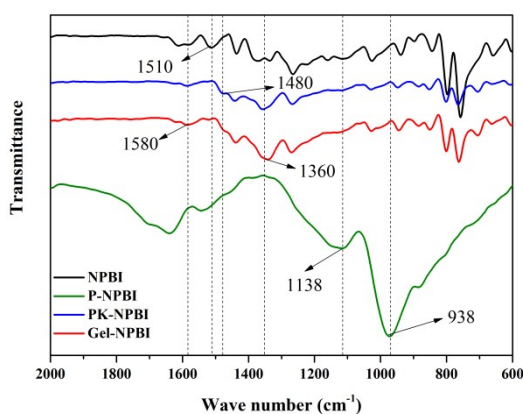

**Figure S2.** IR spectra of pristine NPBI membrane, and three NPBI-based ISMs in the region of 600 - 2000 cm<sup>-1</sup>.

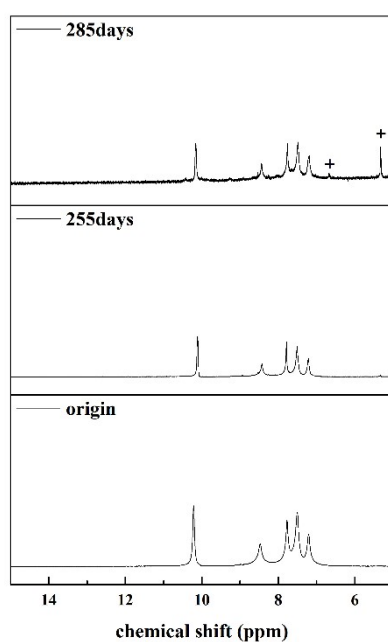

**Figure S3.**  $^1\text{H}$  NMR spectra of pristine and aged PK-NPBI after immersion in 6M KOH at different durations.

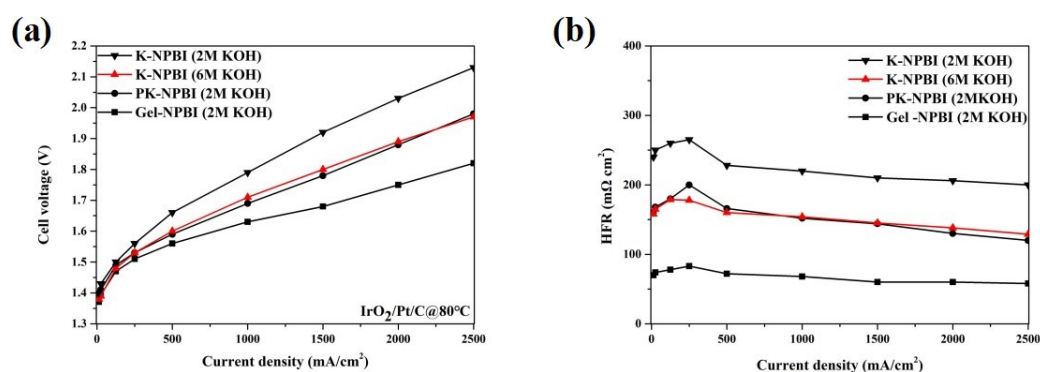

**Figure S4.** Comparison of electrolysis polarization (a) and high-frequency resistance (HFR) (b) in different KOH concentrations with different membranes: Gel-NPBI, PK-NPBI and K-NPBI membranes. Testing conditions:  $80^\circ\text{C}$ ,  $1.5 \text{ mg}/\text{cm}^2$   $\text{IrO}_2$  anode, and  $0.5 \text{ mg}/\text{cm}^2$  Pt/C cathode.

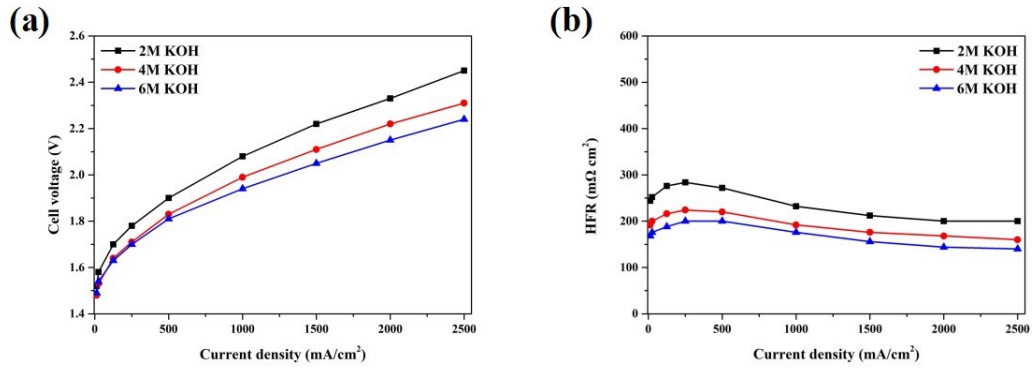

**Figure S5.** Comparison of electrolysis polarization (a) and high-frequency resistance (HFR) (b) consisting of different KOH concentrations with PK-NPBI membranes. Testing conditions: 80 °C, anode/cathode with Ni/Al foam.

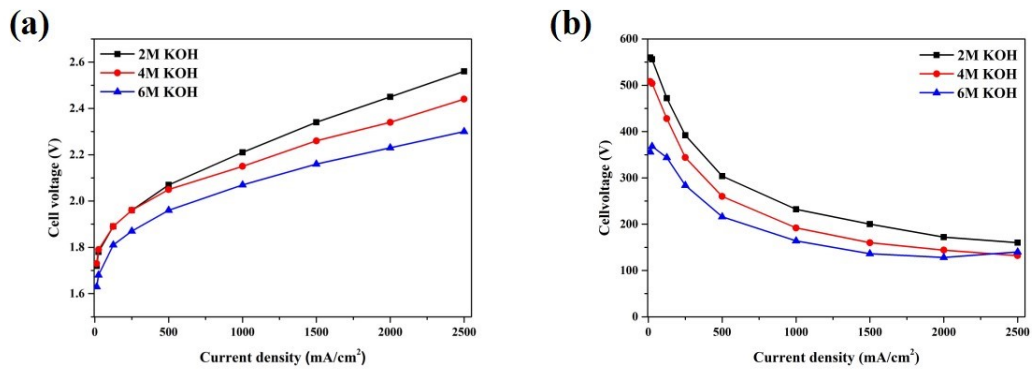

**Figure S6.** Comparison of electrolysis polarization (a) and high-frequency resistance (HFR) (b) consisting of different KOH concentrations with PK-NPBI membranes. Testing conditions: 80 °C, anode/cathode with Ni foam.

|                  | <b>AEMS</b>              | <b>Catalyst</b>                              | <b>Electrolyte</b> | <b>Temperature</b> | <b>Current density</b> |                        | <b>Durability</b>                            |
|------------------|--------------------------|----------------------------------------------|--------------------|--------------------|------------------------|------------------------|----------------------------------------------|
| 21c              | PTFE-Sustainions         | Fe–Ni–Mo/Ni-Mo                               | 1M KOH             | 80°C               | 1.57V                  | 1A/cm <sup>2</sup>     | 25h, 0.5A/cm <sup>2</sup> , 1MKOH            |
| 1                | PTFE-Sustainions         | Ni–Fe                                        | 1 M KOH            | 60°C               | 2.0 V                  | 0.62 A/cm <sup>2</sup> | 240h, 0.5A/cm <sup>2</sup> , 60°C, 1MKOH     |
| 21a              | PTFE-Sustainion          | RANEY Ni<br>NiFe <sub>2</sub> O <sub>4</sub> | 1 M KOH            | 60°C               | 1.8V                   | 0.84 A/cm <sup>2</sup> | 12000h, 1A/cm <sup>2</sup> , 60°C, 1MKOH     |
| 21a              | FAS-50                   | NiFeCo/NiFe <sub>2</sub> O <sub>4</sub>      | 1 M KOH            | 60°C               | 1.8 V                  | 0.24 A/cm <sup>2</sup> | 200h, 1A/cm <sup>2</sup> , 60°C              |
| 21b              | A201                     | Ni/CP                                        | 1M KOH             | 50°C               | 1.9 V                  | 0.35 A/cm <sup>2</sup> |                                              |
| 21d              | PBI/mTPN                 | Ni/Fe<br>Mo                                  | 1M KOH             | 50°C               | 1.98V                  | 0.25 A/cm <sup>2</sup> | 200h, 0.25A/cm <sup>2</sup> , 50°C, 1MKOH    |
| 1                | PFTP-13                  | Ni/Fe                                        | 1M KOH             | 80°C               | 2V                     | 1.6 A/cm <sup>2</sup>  | 1000h, 0.5A/cm <sup>2</sup> , 60°C, 1MKOH    |
| 21i              | Fumatech FAS-50          | NiFe <sub>2</sub> O <sub>4</sub> NiFeCo      | 1M KOH             | 60°C               | 1.9V                   | 0.5 A/cm <sup>2</sup>  | 200h, 1A/cm <sup>2</sup> , 60°C, 1MKOH       |
| 21i              | Sustainion 37-50         | NiFe <sub>2</sub> O <sub>4</sub><br>NiFeCo   | 1M KOH             | 60°C               | 1.9V                   | 1 A/cm <sup>2</sup>    | 2000h, 1A/cm <sup>2</sup> ,60°C,1MKOH        |
| <b>This work</b> | <b>Gel-NPBI</b>          | Pt/C@IrO <sub>2</sub>                        | 2M KOH             | 80°C               | 1.8V                   | 2.5 A/cm <sup>2</sup>  |                                              |
| <b>This work</b> | <b>Gel-NPBI</b>          | Nickel/Al                                    | 6M KOH             | 80°C               | 1.9V                   | 2 A/cm <sup>2</sup>    | 1780h, 0.5A/cm <sup>2</sup> , 58°C, 2MKOH    |
| <b>This work</b> | <b>Gel-NPBI</b>          | Nickel/Al                                    | 6M KOH             | 80°C               | 2.49V                  | 8 A/cm <sup>2</sup>    |                                              |
| <b>This work</b> | <b>Gel-NPBI</b>          | Ni foam                                      | 6MKOH              | 80°C               | 2.2V                   | 2 A/cm <sup>2</sup>    |                                              |
|                  | <b>ISMS</b>              | <b>Catalyst</b>                              | <b>Electrolyte</b> | <b>Temperature</b> | <b>Current density</b> |                        | <b>Durability</b>                            |
| 10               | PTFE reinforced Gel-mPBI | RANEY Ni                                     | 24% KOH            | 80°C               | 1.83V                  | 1.8 A/cm <sup>2</sup>  | 1000h, 0.5 A/cm <sup>2</sup> , 80°C, 24% KOH |
| 9a               | m-PBI                    | RANEY Ni                                     | 24% KOH            | 80°C               | 1.8V                   | 1.7 A/cm <sup>2</sup>  |                                              |
| 9a               | m-PBI                    | Nickel foam                                  | 24%KOH             | 80°C               | 2.2V                   | 1.2 A/cm <sup>2</sup>  | 48h, 2V, 80°C, 20%KOH                        |
| 9d               | mes-PBI                  | Nickel foam                                  | 25% KOH            | 80°C               | 2.5V                   | 1.1 A/cm <sup>2</sup>  | 80h, 0.2A/cm <sup>2</sup> , 80°C, 25%KOH     |
| 21h              | Porous-PFSA              |                                              | 30% KOH            | 80°C               | 2.2V                   | 0.2 A/cm <sup>2</sup>  |                                              |
| 9a               | Zirfon                   | Nickel foam                                  | 30%KOH             | 80°C               | 2.3V                   | 1 A/cm <sup>2</sup>    |                                              |
| 21g              | Zirfon-80                | Nickel foam                                  | 30%KOH             | 80°C               | 2V                     | 1 A/cm <sup>2</sup>    |                                              |
| 21g              | Zirfon-80                | Nickel foam LDH-NiFe                         | 30%KOH             | 80°C               | 2.1V                   | 2 A/cm <sup>2</sup>    | 300h, 1A/cm <sup>2</sup> , 80°C 30%KOH       |
| 21e              | NPBI-BS-47               | Nickel foam                                  | 6M KOH             | 80°C               | 1.8V                   | 1 A/cm <sup>2</sup>    | 100h, 0.8/1.6A/cm <sup>2</sup> , 80°C, 6MKOH |
| 36               | PVA-ABPBI                | Nickel foam                                  | 15%KOH             | 70°C               | 1.9V                   | 0.36 A/cm <sup>2</sup> | 60min, 0.2A/cm <sup>2</sup> , 70°C, 15%KOH   |
| 21f              | PF41                     | Nickel foam                                  | 20%KOH             | 60°C               | 2.2V                   | 0.4 A/cm <sup>2</sup>  | 100h, 0.2A/cm <sup>2</sup> , 60°C, 20%KOH    |

**Table S1.** Comparison of the state-of-the-art AEMWEs with PGM-free catalysts in current research.

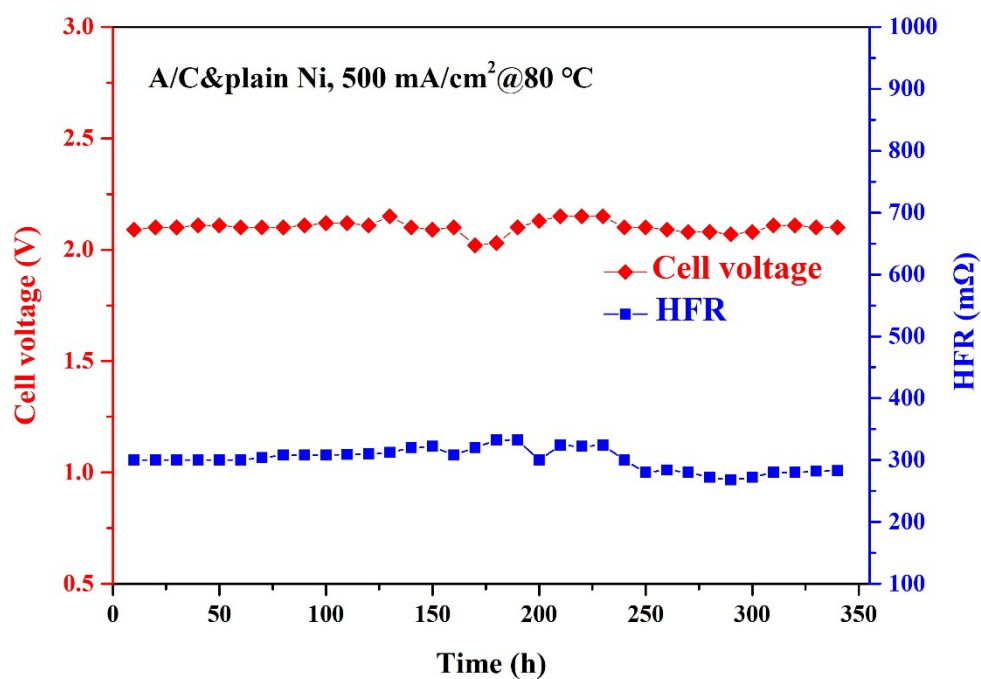

**Figure S7.** In-situ durability of A/C Ni-Al AEMWE based on the PK-NPBI membrane in 2M KOH under 0.5 A/cm<sup>2</sup> at 80°C

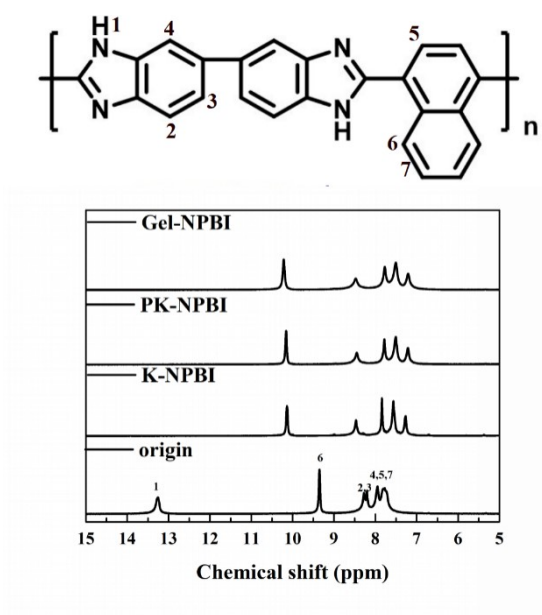

**Figure S8.** <sup>1</sup>H NMR spectra of homogeneous and Gel-NPBI membrane.

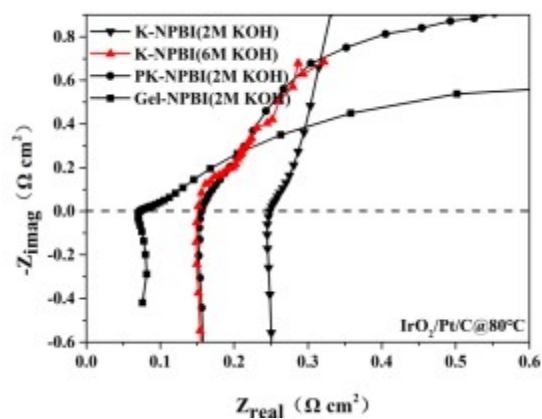

**Fig.S9** Impedance curves at  $250 \text{ mA}/\text{cm}^2$ , Operating conditions:  $80^\circ\text{C}$ ,  $1.5 \text{ mg}/\text{cm}^2$   $\text{IrO}_2$  anode, and  $0.5 \text{ mg}/\text{cm}^2$   $\text{Pt}/\text{C}$  cathode

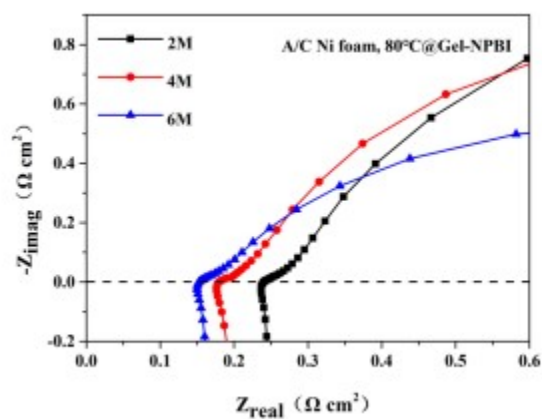

**Fig.S10** Impedance curves at  $250 \text{ mA}/\text{cm}^2$ , Operating conditions:  $80^\circ\text{C}$ , anode/cathode with Ni foam

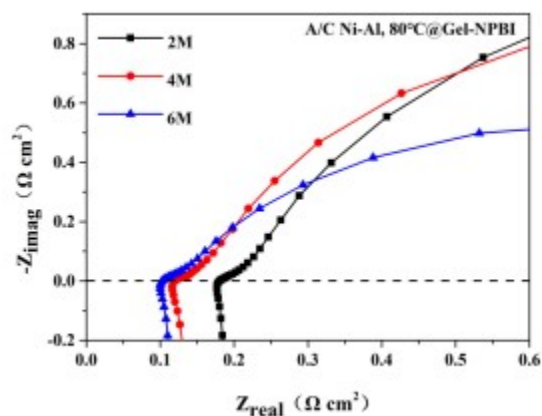

**Fig.S11** Impedance curves at  $250 \text{ mA}/\text{cm}^2$ , Operating conditions:  $80^\circ\text{C}$ , anode/cathode with Ni/Al foam

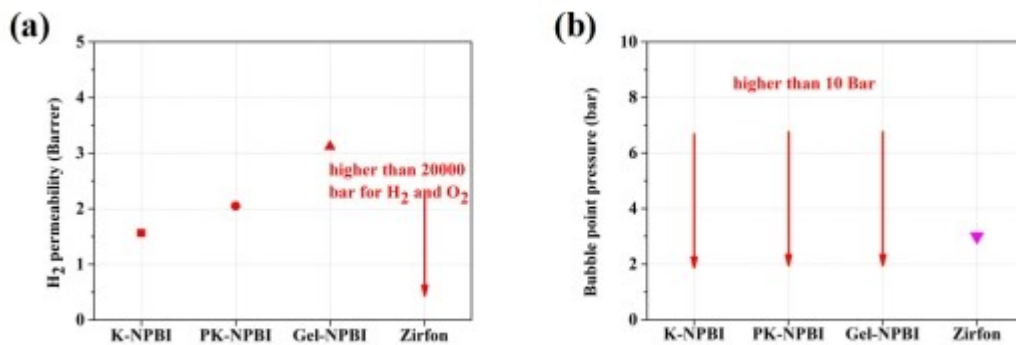

**Fig.S12.** The H<sub>2</sub> permeability (a) and bubble point pressure (b) of K-NPBI, PK-NPBI, Gel-NPBI, and Zirfon at room temperature

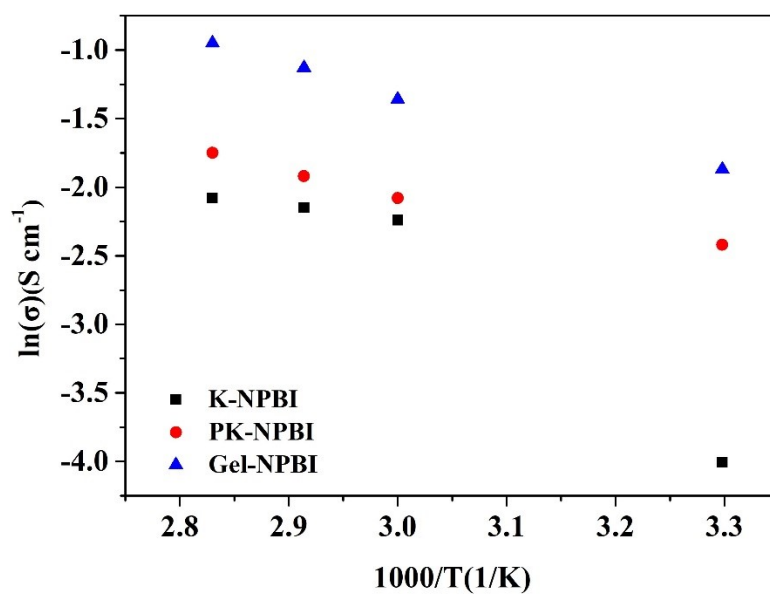

**Fig. S13** the relationship between  $\ln(\sigma)$  and  $1000/T$  for different membrane in 6 M KOH.

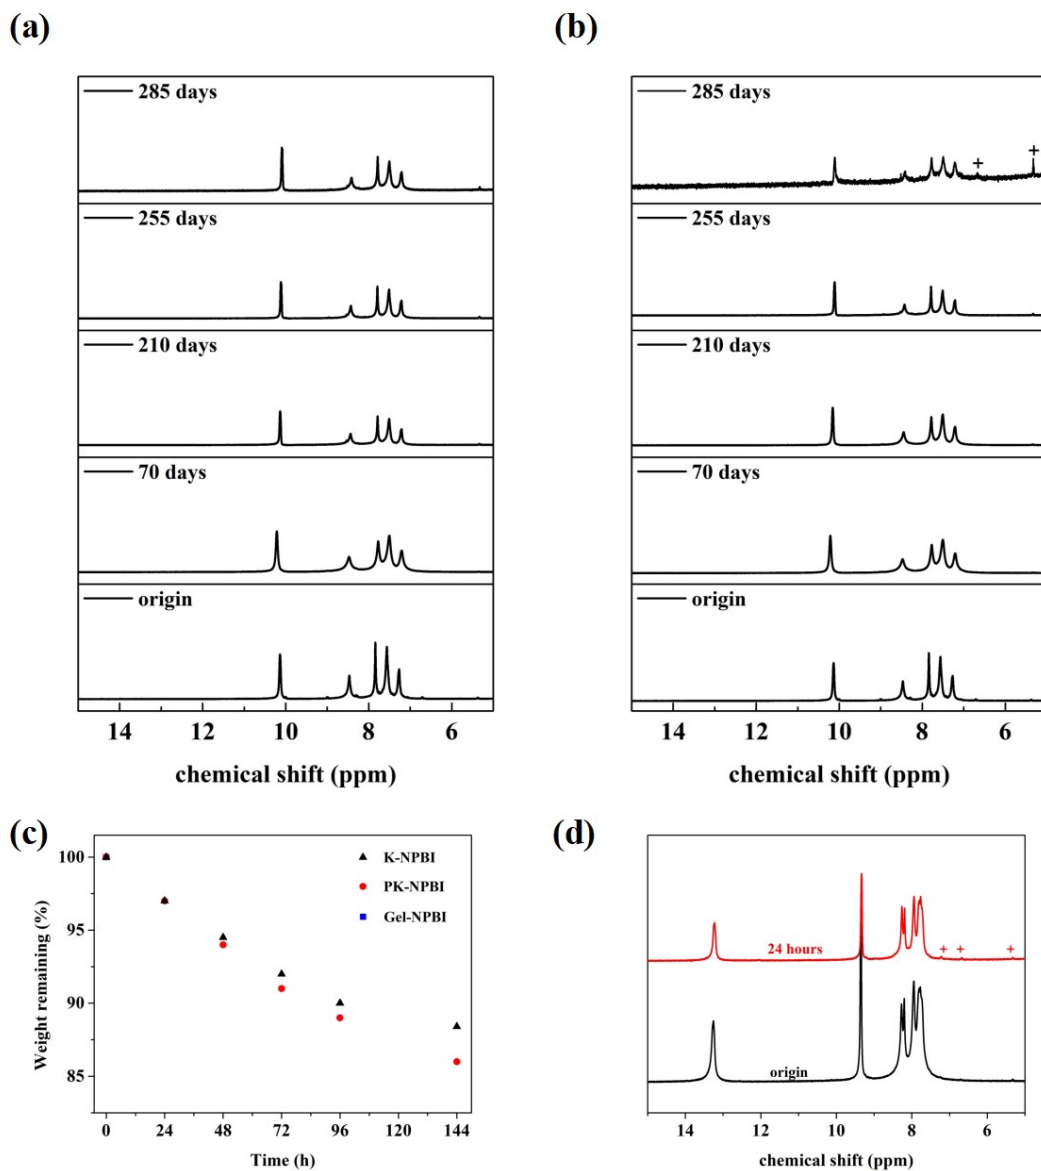

**Fig.S14**  $^1\text{H}$  NMR spectra of origin and aged Gel NPBI after immersion in (a) 2M and (b) 6M KOH at different durations; (c) Weight change of dry membranes in Fenton's reagent at 80 °C for different durations and (e)  $^1\text{H}$  NMR spectra of Gel-NPBI membrane in DMSO- $d_6$  before and after oxidation test.



| intrinsic viscosity | Test condition   | Initial | After In situ tests |
|---------------------|------------------|---------|---------------------|
| Gel-NPBI            | (2M 80°C 2 V)    | 1.63    | 0.84                |
| Gel-NPBI            | (6M 80°C 1.95 V) |         | 0.65                |
| Gel-NPBI            | (2M 30°C 2.75 V) |         | 0.42                |
| Gel-NPBI            | (2M 30°C 2.2 V)  |         | 1.09                |
| Gel-NPBI            | (2M 58°C 2.15V)  |         | 1.2                 |
| Gel-NPBI            | (6M 58°C 2.1V)   |         | 0.97                |

**Table S2** Intrinsic viscosities for Gel-NPBI membranes before and after in situ durability tests at different conditions

| H <sub>2</sub> permeability(barrer) | Initial | After In situ tests |
|-------------------------------------|---------|---------------------|
| Gel-NPBI <sup>a</sup>               | 3.54    | 4.7                 |
| Gel-NPBI <sup>b</sup>               | 3.52    | 6.97                |

**Table S3** gas permeability of Gel-NPBI before and after durability test at 58 °C

Testing conditions: <sup>a</sup> the cell durability was tested at 500 mA cm<sup>-2</sup> and 58 °C using 2 M KOH electrolyte; <sup>b</sup> the cell durability was tested at 500 mA cm<sup>-2</sup> and 58 °C using 6 M KOH electrolyte.

## Reference

[1] a)N. Chen, S. Y. Paek, J. Y. Lee, J. H. Park, S. Y. Lee, Y. M. Lee, *Energy & Environmental Science* 2021, 14, 6338-6348.

- [9] a)M. R. Kraglund, M. Carmo, G. Schiller, S. A. Ansar, D. Aili, E. Christensen, J. O. Jensen, *Energy & Environmental Science* 2019, *12*, 3313-3318; d)D. Aili, A. G. Wright, M. R. Kraglund, K. Jankova, S. Holdcroft, J. O. Jensen, *Journal of Materials Chemistry A* 2017, *5*, 5055-5066.
- [10] M. L. A. Trisno, A. Dayan, S. J. Lee, F. Egert, M. Gerle, M. R. Kraglund, J. O. Jensen, D. Aili, A. Roznowska, A. Michalak, H. S. Park, F. Razmjooei, S.-A. Ansar, D. Henkensmeier, *Energy & Environmental Science* 2022, *15*, 4362-4375.
- [21] a)B. Motealleh, Z. Liu, R. I. Masel, J. P. Sculley, Z. R. Ni, L. Meroueh, *International Journal of Hydrogen Energy* 2021, *46*, 3379-3386; b)L. A. Diaz, R. E. Coppola, G. C. Abuin, R. Escudero-Cid, D. Herranz, P. Ocon, *Journal of Membrane Science* 2017, *535*, 45-55; c)P. Chen, X. Hu, *Advanced Energy Materials* 2020, *10*; d)M. Najibah, E. Tsoy, H. Khalid, Y. Chen, Q. Li, C. Bae, J. Hnat, M. Plevova, K. Bouzek, J. H. Jang, H. S. Park, D. Henkensmeier, *Journal of Membrane Science* 2021, *640*; e)X. Hu, M. Liu, Y. Huang, L. Liu, N. Li, *Journal of Membrane Science* 2022, *663*; f)A. Konovalova, H. Kim, S. Kim, A. Lim, H. S. Park, M. R. Kraglund, D. Aili, J. H. Jang, H.-J. Kim, D. Henkensmeier, *Journal of Membrane Science* 2018, *564*, 653-662; g)H. I. Lee, M. Mehdi, S. K. Kim, H. S. Cho, M. J. Kim, W. C. Cho, Y. W. Rhee, C. H. Kim, *Journal of Membrane Science* 2020, *616*; h)D. Aili, M. K. Hansen, J. W. Andreasen, J.

Zhang, J. O. Jensen, N. J. Bjerrum, Q. Li, *Journal of Membrane Science* 2015, *493*, 589-598; i)Z. Liu, S. D. Sajjad, Y. Gao, H. Yang, J. J. Kaczur, R. I. Masel, *International Journal of Hydrogen Energy* 2017, *42*, 29661-29665.
